# Supplementary material for: PSAT1 is a promising tumor microenvironment-related prognostic biomarker in non-small cell lung cancer
Source: Research Square preprint supplement (doi:10.21203/rs.3.rs-1641195/v1), 2022-05-13
Supplement: Supplementary file 1 [file 5fcc3abfd3ba8a58aa3ff672.xlsx]

## Sheet: Sheet1
	Table S1 The DEGs of closely related to overall survival in GSE37745
			Stromal score							Immune score							Survival
Probe_ID	ENTREZ_GENE_ID	geneName	logFC	AveExpr	t	P.Value	adj.P.Val	B		logFC	AveExpr	t	P.Value	adj.P.Val	B		P.value
209539_at	9459	ARHGEF6	0.576002	8.32348	7.20319	1.22901e-11	9.37077e-10	16.0299		0.721614	8.32348	9.79109	1.09917e-18	1.13882e-16	31.8215		0.00467571
1559584_a_at	283897	C16orf54	0.793392	6.9463	5.53485	9.88932e-08	2.8401e-06	7.33579		1.12468	6.9463	8.54817	3.49626e-15	2.41108e-13	23.8897		0.0013183
219505_at	51816	CECR1	0.522178	9.42101	4.48746	1.22643e-05	0.000170895	2.73121		0.925821	9.42101	9.00803	1.85784e-16	1.5181e-14	26.7741		0.00559469
209687_at	6387	CXCL12	0.935996	8.08073	9.29154	2.95233e-17	9.40145e-15	28.6303		0.786149	8.08073	7.34291	5.44048e-12	2.68969e-10	16.6821		0.0202756
205242_at	10563	CXCL13	0.762798	9.07114	3.34666	0.000980145	0.00592665	-1.37117		1.31759	9.07114	6.13855	4.52462e-09	1.57518e-07	10.1217		0.00575562
209606_at	9595	CYTIP	0.779918	8.17676	7.22066	1.1105e-11	8.52721e-10	16.1284		1.04998	8.17676	10.9772	3.62533e-22	6.0855e-20	39.719		0.0250037
209392_at	5168	ENPP2	0.743603	9.47493	7.28565	7.60574e-12	5.9889e-10	16.4959		0.639852	9.47493	6.06006	6.83607e-09	2.30933e-07	9.72066		0.0190837
206439_at	1833	EPYC	0.948524	3.89462	5.18163	5.43819e-07	1.23178e-05	5.70078		0.603678	3.89462	3.17131	0.00176115	0.0121762	-2.17312		0.0148843
229152_at	260436	FDCSP	0.73474	6.20719	2.83572	0.00505131	0.0212638	-2.86413		0.771888	6.20719	2.98545	0.0031919	0.0191939	-2.71756		0.0194472
223434_at	2635	GBP3	0.698512	9.41043	4.12958	5.37326e-05	0.000579445	1.33535		0.810542	9.41043	4.86569	2.33651e-06	4.83236e-05	4.08231		0.0474936
228071_at	168537	GIMAP7	0.84841	7.88904	6.44538	8.73469e-10	4.13875e-08	11.8971		1.07479	7.88904	8.74402	1.0096e-15	7.41082e-14	25.1101		0.0388675
205419_at	1880	GPR183	1.09911	8.75525	9.61422	3.54804e-18	1.42277e-15	30.6979		1.14371	8.75525	10.2052	6.88705e-20	8.47227e-18	34.5493		0.0327017
202957_at	3059	HCLS1	0.614656	9.0266	5.55473	8.96442e-08	2.60209e-06	7.43015		0.748472	9.0266	7.03631	3.21648e-11	1.45104e-09	14.9443		0.0317919
201137_s_at	3115	HLA-DPB1	0.650983	8.85806	6.55438	4.81234e-10	2.43473e-08	12.4739		0.977969	8.85806	11.5647	6.31165e-24	1.32692e-21	43.712		0.0250794
209374_s_at	3507	IGHM	0.625775	9.2891	3.72393	0.000256248	0.00206045	-0.128245		0.988025	9.2891	6.2166	2.99174e-09	1.08515e-07	10.524		0.00121024
212592_at	3512	IGJ	0.657753	12.1625	3.86105	0.000153203	0.00136746	0.35203		0.899401	12.1625	5.46304	1.40723e-07	3.80426e-06	6.78904		0.00145939
211908_x_at	50802	IGK	0.565697	8.99269	3.31327	0.0010979	0.00646207	-1.47552		0.853844	8.99269	5.18987	5.2309e-07	1.26417e-05	5.52177		0.0328886
217235_x_at	100423062	IGLL5	0.618978	11.1103	3.26785	0.00127928	0.00730822	-1.61594		0.896822	11.1103	4.88297	2.16114e-06	4.53462e-05	4.1572		0.00585315
1558176_at	100290481	IGLV1-44	0.576957	9.39094	3.5751	0.00044071	0.00317153	-0.632451		0.784001	9.39094	4.99774	1.28048e-06	2.87929e-05	4.66002		0.0400362
204912_at	3587	IL10RA	0.653187	8.68831	7.42071	3.44342e-12	2.89007e-10	17.2658		0.946695	8.68831	12.9359	4.37745e-28	1.50459e-25	53.1547		0.00173248
211339_s_at	3702	ITK	0.67779	6.99437	5.90593	1.52206e-08	5.26497e-07	9.13693		1.19041	6.99437	13.0725	1.67546e-28	6.59643e-26	54.1018		0.0315266
212188_at	115207	KCTD12	0.62342	10.1004	5.63852	5.91075e-08	1.7926e-06	7.83057		0.746108	10.1004	6.9976	4.01355e-11	1.79565e-09	14.7279		0.0433649
204438_at	4360	MRC1	1.14858	9.6214	7.89952	1.9534e-13	2.29886e-11	20.0563		1.17899	9.6214	8.17874	3.51946e-14	2.24148e-12	21.6224		0.047991
221286_s_at	51237	MZB1	0.577377	8.77376	3.27366	0.00125461	0.00718902	-1.59807		0.752988	8.77376	4.35346	2.15516e-05	0.00034214	1.9584		0.0028208
228055_at	256236	NAPSB	0.657644	6.75996	4.85299	2.47413e-06	4.4484e-05	4.25326		0.873934	6.75996	6.76753	1.47454e-10	6.22411e-09	13.4572		0.0255401
228298_at	91523	PCED1B	0.50901	7.33304	5.0972	8.07979e-07	1.72885e-05	5.32193		0.738968	7.33304	8.01041	9.92383e-14	5.95265e-12	20.6053		0.0334585
206369_s_at	5294	PIK3CG	0.554526	5.67215	8.49397	4.92013e-15	8.19542e-13	23.6416		0.675425	5.67215	11.4092	1.85132e-23	3.61158e-21	42.6512		0.0463664
210845_s_at	5329	PLAUR	0.785416	9.04802	7.20608	1.20858e-11	9.24753e-10	16.0462		0.587792	9.04802	5.10411	7.82333e-07	1.83738e-05	5.13405		0.0351017
220892_s_at	29968	PSAT1	-0.546996	8.58021	-3.23	0.00145134	0.00804387	-1.73165		-0.648709	8.58021	-3.87269	0.000146561	0.00167563	0.143181		0.00184766
219494_at	25788	RAD54B	-0.627785	6.65631	-5.4211	1.72669e-07	4.59912e-06	6.80055		-0.540956	6.65631	-4.5838	8.11415e-06	0.000145691	2.89		0.0266921
203185_at	9770	RASSF2	0.614324	8.06885	6.91489	6.42615e-11	4.06877e-09	14.4248		0.668365	8.06885	7.69733	6.63507e-13	3.53881e-11	18.7425		0.023961
202388_at	5997	RGS2	0.764187	10.5276	6.92337	6.12421e-11	3.9004e-09	14.4714		0.632514	10.5276	5.52207	1.05323e-07	2.9202e-06	7.0692		0.0481218
203485_at	6252	RTN1	0.695248	6.46917	5.65962	5.31878e-08	1.63598e-06	7.93208		1.07002	6.46917	9.88371	5.93409e-19	6.36122e-17	32.4284		0.0251422
204563_at	6402	SELL	0.663054	7.77379	5.66738	5.11602e-08	1.5826e-06	7.96947		0.952584	7.77379	8.95922	2.54442e-16	2.0182e-14	26.4648		0.0355289
204051_s_at	6424	SFRP4	1.50608	8.42953	8.74696	9.9086e-16	2.00524e-13	25.2036		0.622895	8.42953	3.14508	0.00191847	0.0130064	-2.25174		0.0288889
219159_s_at	57823	SLAMF7	0.522757	7.41961	4.25013	3.30023e-05	0.000386496	1.79483		1.00864	7.41961	9.47249	9.02623e-18	8.38858e-16	29.7491		0.00939167
231579_s_at	7077	TIMP2	0.814545	9.96952	10.4408	1.40426e-20	1.16953e-17	36.0986		0.540533	9.96952	6.0517	7.14177e-09	2.39023e-07	9.67816		0.00505815
201147_s_at	7078	TIMP3	1.04052	9.33836	9.33776	2.18298e-17	7.412e-15	28.9249		0.581518	9.33836	4.56752	8.70493e-06	0.000154886	2.82285		0.00998128
206641_at	608	TNFRSF17	0.684083	7.23402	3.52964	0.000518363	0.00361037	-0.782901		0.980547	7.23402	5.23761	4.17237e-07	1.03492e-05	5.73973		0.000132754
210915_x_at	28639	TRBC1	0.699919	9.34687	5.75856	3.23133e-08	1.03815e-06	8.41168		1.30855	9.34687	14.155	8.23679e-32	7.75475e-29	61.613		0.0444879
209263_x_at	7106	TSPAN4	0.69763	8.50115	6.97922	4.45734e-11	2.8898e-09	14.7796		0.634508	8.50115	6.2159	3.00285e-09	1.08735e-07	10.5204		0.0270137
203868_s_at	7412	VCAM1	0.910516	9.32259	8.58648	2.74479e-15	4.95297e-13	24.2104		0.812794	9.32259	7.38829	4.16772e-12	2.09975e-10	16.9429		0.0158844
1555938_x_at	7431	VIM	0.825061	9.37212	9.65601	2.69175e-18	1.12772e-15	30.9675		0.644922	9.37212	6.93433	5.75463e-11	2.54828e-09	14.3759		0.0143172
