# Supplementary material for: PSAT1 is a promising tumor microenvironment-related prognostic biomarker in non-small cell lung cancer
Source: Research Square preprint supplement (doi:10.21203/rs.3.rs-1641195/v1), 2022-05-13
Supplement: Supplementary file 2 [file bef2d79dd6fbe899e91f005a.xlsx]

## Sheet: Sheet1
Table S3 Clinical features of NSCLC patients for a cohort of 99 NSCLC patients
ID	Gender	Age (y)	Style	Stage	T	N	M	Time(m)	Status	Staining intensity	Area	Score(staining intensity *Area)
1	0	49	NSCLC	3A	1b	2	0	131	1	1	5	5
2	1	55	NSCLC	3A	1c	0	0	110	1	1	10	10
3	1	79	NSCLC	1A2	1b	0	0	103	1	2	5	10
4	0	46	NSCLC	1B	2a	0	0	77	1	2	40	80
5	0	64	NSCLC	3B	3	0	0	101	1	1	20	20
6	1	68	NSCLC	1B	2	0	0	86	1	1	60	60
7	0	49	NSCLC	3A	2a	2	0	55	1	2	60	120
8	1	45	NSCLC	3B	1b	3	0	101	1	1	20	20
9	1	64	NSCLC	1B	2a	0	0	13	1	3	70	210
10	1	51	NSCLC	3A	2a	2	0	114	1	1	5	5
11	0	48	NSCLC	1A	1b	0	0	70	1	2	60	120
12	0	53	NSCLC	1A	1b	0	0	71	1	2	50	100
13	1	66	NSCLC	3A	1b	2	0	70	1	2	60	120
14	0	57	NSCLC	3A	4	0	0	57	1	2	60	120
15	0	52	NSCLC	2A	2a	1	0	91	1	1	40	40
16	0	74	NSCLC	1A	1c	0	0	92	1	1	40	40
17	0	70	NSCLC	3A	1b	2	0	66	1	2	60	120
18	0	75	NSCLC	1A	1a	0	0	90	1	2	20	40
19	1	59	NSCLC	1B	2a	0	0	88	1	2	30	60
20	1	79	NSCLC	1A2	1b	0	0	90	1	1	60	60
21	1	60	NSCLC	3A	1b	2	0	57	1	2	60	120
22	1	59	NSCLC	1A2	1b	0	0	85	1	1	70	70
23	1	51	NSCLC	1A2	1b	0	0	76	1	2	50	100
24	0	40	NSCLC	2A	2b	0	0	4	1	4	70	280
25	1	76	NSCLC	1B	2a	0	0	87	1	1	60	60
26	1	62	NSCLC	1A	1a	0	0	47	1	2	70	140
27	1	80	NSCLC	1A2	1b	0	0	37	0	2	70	140
28	0	57	NSCLC	3A	1b	2	0	13	0	3	70	210
29	1	52	NSCLC	1A	1a	0	0	86	0	1	70	70
30	0	53	NSCLC	1A1	1a	0	0	52	0	4	30	120
31	0	54	NSCLC	1A2	1b	0	0	72	0	2	50	100
32	1	68	NSCLC	1A1	1a	2	0	83	0	2	40	80
33	1	69	NSCLC	3A	1b	2	0	84	0	1	70	70
34	0	73	NSCLC	1A2	1b	0	0	45	0	2	70	140
35	0	54	NSCLC	3A	4	0	0	46	0	2	70	140
36	1	63	NSCLC	3A	4	0	0	84	0	1	70	70
37	0	80	NSCLC	1A2	1b	0	0	80	0	1	80	80
38	1	60	NSCLC	1A2	1b	0	0	79	0	1	80	80
39	0	55	NSCLC	3A	4	0	0	83	0	2	40	80
40	0	53	NSCLC	3A	1b	0	0	88	0	1	60	60
41	1	63	NSCLC	2A	2a	1	0	74	0	2	50	100
42	1	56	NSCLC	1B	2a	0	0	48	0	2	70	140
43	1	65	NSCLC	1A2	1b	0	0	89	0	1	60	60
44	0	73	NSCLC	1A3	1c	0	0	98	0	1	25	25
45	1	56	NSCLC	1B	2a	0	0	77	0	2	40	80
46	1	67	NSCLC	3A	1b	2	0	91	0	1	40	40
47	0	50	NSCLC	1B	2a	0	0	65	0	2	60	120
48	0	50	NSCLC	1A1	1a	0	0	94	0	1	30	30
49	0	48	NSCLC	3A	2a	2	0	42	0	2	70	140
50	0	60	NSCLC	1A3	1c	0	0	35	0	2	80	160
51	1	66	NSCLC	1A	1a	0	0	36	0	3	50	150
52	0	71	NSCLC	1A3	1c	0	0	37	0	3	50	150
53	0	69	NSCLC	3A	2s	2	0	50	0	2	70	140
54	0	52	NSCLC	4	1a	0	0	29	0	2	80	160
55	0	64	NSCLC	1B	1b	0	0	14	0	3	60	180
56	1	58	NSCLC	1B	1b	0	0	9	0	3	80	240
57	0	47	NSCLC	1B	2a	0	0	34	0	4	40	160
58	1	76	NSCLC	2A	1b	1	0	68	0	2	60	120
59	0	58	NSCLC	2B	3	0	0	50	0	2	70	140
60	1	67	NSCLC	1B	2a	0	0	95	0	2	15	30
61	1	35	NSCLC	1A	1a	0	0	67	0	2	60	120
62	1	72	NSCLC	3A	4	0	0	90	0	1	60	60
63	0	67	NSCLC	1A1	1a	0	0	40	0	2	70	140
64	0	59	NSCLC	3A	3	1	0	35	0	2	80	160
65	1	67	NSCLC	1B	2a	0	0	14	0	2	95	190
66	0	66	NSCLC	1A	1b	0	0	94	0	2	20	40
67	0	61	NSCLC	1A	1b	0	0	111	0	1	10	10
68	1	72	NSCLC	3A	1b	2	0	5	0	4	60	240
69	1	67	NSCLC	1B	2	0	0	21	0	3	60	180
70	0	51	NSCLC	1B	2a	0	0	15	0	3	60	180
71	0	55	NSCLC	1A	1a	0	0	8	0	4	60	240
72	1	52	NSCLC	2A	2a	1	0	55	0	2	60	120
73	0	57	NSCLC	3A	2a	2	0	43	0	2	70	140
74	1	65	NSCLC	1A	1b	0	0	11	0	3	70	210
75	1	59	NSCLC	1A	1a	0	0	47	0	2	70	140
76	0	52	NSCLC	1A	1b	0	0	77	0	1	80	80
77	0	61	NSCLC	1A	1a	0	0	27	0	3	60	180
78	1	63	NSCLC	1A3	1c	0	0	15	0	3	60	180
79	0	59	NSCLC	1B	1b	0	0	26	0	3	60	180
80	0	56	NSCLC	1B	1b	0	0	58	0	2	60	120
81	0	59	NSCLC	1A	1b	0	0	21	0	3	60	180
82	0	39	NSCLC	3A	1b	2	0	87	0	1	60	60
83	0	55	NSCLC	1A	1b	0	0	84	0	1	80	80
84	0	68	NSCLC	1B	2	0	0	28	0	3	60	180
85	0	63	NSCLC	2A	2a	0	0	9	0	4	60	240
86	1	57	NSCLC	1A	1c	0	0	22	0	3	60	180
87	0	63	NSCLC	1A	1b	0	0	16	0	3	60	180
88	0	72	NSCLC	1A	1a	0	0	9	0	4	60	240
89	0	73	NSCLC	1A	1a	0	0	54	0	2	60	120
90	0	40	NSCLC	1A	1a	0	0	17	0	3	60	180
91	0	41	NSCLC	3A	2	2	0	41	0	2	70	140
92	1	68	NSCLC	1A	1b	0	0	16	0	3	60	180
93	1	62	NSCLC	1A	1b	0	0	98	0	1	30	30
94	1	57	NSCLC	1B	1b	0	0	52	0	2	60	120
95	1	64	NSCLC	1B	2	0	0	18	0	3	60	180
96	1	67	NSCLC	1B	2a	0	0	77	0	2	50	100
97	0	32	NSCLC	2A	2a	1	0	82	0	1	80	80
98	0	40	NSCLC	3A	3	2	0	64	0	2	60	120
99	0	64	NSCLC	1A	1b	0	0	1	0	4	80	320
