# Supplementary material for: PSAT1 is a promising tumor microenvironment-related prognostic biomarker in non-small cell lung cancer
Source: Research Square preprint supplement (doi:10.21203/rs.3.rs-1641195/v1), 2022-05-13
Supplement: Supplementary file 3 [file ca27853b9244b769afa8b651.xlsx]

## Sheet: Sheet1
	Table S4 GO (BP) of top 20 PSAT1 co-expression genes
ID	Description	GeneRatio	BgRatio	pvalue	p.adjust	qvalue	geneID	Count
GO:1901607	alpha-amino acid biosynthetic process	44428	68/18723	2.40615e-15	7.91623e-13	4.58435e-13	ALDH18A1/ASNS/MTHFD1/PHGDH/PSAT1/PSPH/SHMT1/SHMT2	8
GO:0008652	cellular amino acid biosynthetic process	44428	76/18723	6.10971e-15	9.71826e-13	5.62792e-13	ALDH18A1/ASNS/MTHFD1/PHGDH/PSAT1/PSPH/SHMT1/SHMT2	8
GO:0009069	serine family amino acid metabolic process	44397	40/18723	8.86164e-15	9.71826e-13	5.62792e-13	GART/MTHFD1/PHGDH/PSAT1/PSPH/SHMT1/SHMT2	7
GO:0009070	serine family amino acid biosynthetic process	44367	21/18723	3.48453e-14	2.86603e-12	1.65974e-12	MTHFD1/PHGDH/PSAT1/PSPH/SHMT1/SHMT2	6
GO:1901605	alpha-amino acid metabolic process	44459	195/18723	1.82259e-13	1.19926e-11	6.94503e-12	ALDH18A1/ASNS/GART/MTHFD1/PHGDH/PSAT1/PSPH/SHMT1/SHMT2	9
GO:0006563	L-serine metabolic process	44336	12/18723	6.37785e-13	3.49719e-11	2.02525e-11	PHGDH/PSAT1/PSPH/SHMT1/SHMT2	5
GO:0042147	retrograde transport, endosome to Golgi	44397	91/18723	3.72952e-12	1.75287e-10	1.0151e-10	SNX1/SNX2/TBC1D5/VPS26A/VPS26B/VPS29/VPS35	7
GO:0006520	cellular amino acid metabolic process	44459	284/18723	5.43681e-12	2.23589e-10	1.29482e-10	ALDH18A1/ASNS/GART/MTHFD1/PHGDH/PSAT1/PSPH/SHMT1/SHMT2	9
GO:0046653	tetrahydrofolate metabolic process	44336	19/18723	9.32014e-12	3.40703e-10	1.97304e-10	GART/MTHFD1/MTHFD1L/SHMT1/SHMT2	5
GO:0046394	carboxylic acid biosynthetic process	44459	314/18723	1.33729e-11	4.23352e-10	2.45166e-10	ALDH18A1/ASNS/MTHFD1/MTHFD1L/PHGDH/PSAT1/PSPH/SHMT1/SHMT2	9
GO:0016053	organic acid biosynthetic process	44459	316/18723	1.41546e-11	4.23352e-10	2.45166e-10	ALDH18A1/ASNS/MTHFD1/MTHFD1L/PHGDH/PSAT1/PSPH/SHMT1/SHMT2	9
GO:0006760	folic acid-containing compound metabolic process	44336	26/18723	5.24783e-11	1.43878e-09	8.33208e-10	GART/MTHFD1/MTHFD1L/SHMT1/SHMT2	5
GO:0042558	pteridine-containing compound metabolic process	44336	33/18723	1.88459e-10	4.65208e-09	2.69405e-09	GART/MTHFD1/MTHFD1L/SHMT1/SHMT2	5
GO:0035999	tetrahydrofolate interconversion	44306	10/18723	1.97961e-10	4.65208e-09	2.69405e-09	MTHFD1/MTHFD1L/SHMT1/SHMT2	4
GO:0016482	cytosolic transport	44397	168/18723	2.90268e-10	6.36655e-09	3.68691e-09	SNX1/SNX2/TBC1D5/VPS26A/VPS26B/VPS29/VPS35	7
GO:0006544	glycine metabolic process	44306	16/18723	1.70863e-09	3.51338e-08	2.03462e-08	GART/PHGDH/SHMT1/SHMT2	4
GO:0016197	endosomal transport	44397	230/18723	2.60741e-09	5.0461e-08	2.92224e-08	SNX1/SNX2/TBC1D5/VPS26A/VPS26B/VPS29/VPS35	7
GO:0043648	dicarboxylic acid metabolic process	44336	96/18723	4.65328e-08	8.50516e-07	4.9254e-07	ALDH18A1/MTHFD1/MTHFD1L/SHMT1/SHMT2	5
GO:0006730	one-carbon metabolic process	44306	40/18723	8.44002e-08	1.46146e-06	8.4634e-07	MTHFD1/MTHFD1L/SHMT1/SHMT2	4
GO:0009113	purine nucleobase biosynthetic process	44275	10/18723	1.24483e-07	1.95023e-06	1.12939e-06	GART/SHMT1/SHMT2	3
GO:0009396	folic acid-containing compound biosynthetic process	44275	10/18723	1.24483e-07	1.95023e-06	1.12939e-06	GART/MTHFD1/MTHFD1L	3
GO:0042559	pteridine-containing compound biosynthetic process	44275	15/18723	4.70392e-07	7.0345e-06	4.07373e-06	GART/MTHFD1/MTHFD1L	3
GO:0046112	nucleobase biosynthetic process	44275	18/18723	8.41882e-07	1.20426e-05	6.97394e-06	GART/SHMT1/SHMT2	3
GO:0006144	purine nucleobase metabolic process	44275	19/18723	9.99054e-07	1.36954e-05	7.93109e-06	GART/SHMT1/SHMT2	3
GO:0006575	cellular modified amino acid metabolic process	44336	188/18723	1.32764e-06	1.74717e-05	1.0118e-05	GART/MTHFD1/MTHFD1L/SHMT1/SHMT2	5
GO:0009112	nucleobase metabolic process	44275	34/18723	6.10687e-06	7.72754e-05	4.47507e-05	GART/SHMT1/SHMT2	3
GO:0042398	cellular modified amino acid biosynthetic process	44275	46/18723	1.53656e-05	0.000187232	0.000108428	GART/MTHFD1/MTHFD1L	3
GO:0009066	aspartate family amino acid metabolic process	44275	49/18723	1.86111e-05	0.000218681	0.00012664	ASNS/MTHFD1/PHGDH	3
GO:0006767	water-soluble vitamin metabolic process	44275	59/18723	3.26163e-05	0.000370026	0.000214285	PSAT1/SHMT1/SHMT2	3
GO:0046148	pigment biosynthetic process	44275	62/18723	3.78673e-05	0.000415278	0.000240491	GART/SHMT1/SHMT2	3
GO:0048703	embryonic viscerocranium morphogenesis	44247	10/18723	4.85334e-05	0.000515081	0.000298287	MTHFD1/MTHFD1L	2
GO:0072522	purine-containing compound biosynthetic process	44306	200/18723	5.35342e-05	0.000550399	0.00031874	GART/MTHFD1/SHMT1/SHMT2	4
GO:0032456	endocytic recycling	44275	73/18723	6.1809e-05	0.000616217	0.000356856	VPS26A/VPS29/VPS35	3
GO:0009064	glutamine family amino acid metabolic process	44275	78/18723	7.53455e-05	0.000729079	0.000422215	ALDH18A1/ASNS/PHGDH	3
GO:0042440	pigment metabolic process	44275	84/18723	9.39842e-05	0.000847557	0.000490826	GART/SHMT1/SHMT2	3
GO:0009071	serine family amino acid catabolic process	44247	14/18723	9.78941e-05	0.000847557	0.000490826	SHMT1/SHMT2	2
GO:0043650	dicarboxylic acid biosynthetic process	44247	14/18723	9.78941e-05	0.000847557	0.000490826	MTHFD1/MTHFD1L	2
GO:0046655	folic acid metabolic process	44247	14/18723	9.78941e-05	0.000847557	0.000490826	SHMT1/SHMT2	2
GO:0072673	lamellipodium morphogenesis	44247	17/18723	0.000146022	0.00123183	0.000713361	SNX1/SNX2	2
GO:0006766	vitamin metabolic process	44275	106/18723	0.000187458	0.00154184	0.000892893	PSAT1/SHMT1/SHMT2	3
GO:0006607	NLS-bearing protein import into nucleus	44247	20/18723	0.00020361	0.00163384	0.000946172	KPNA2/KPNB1	2
GO:0009067	aspartate family amino acid biosynthetic process	44247	21/18723	0.000224898	0.00174098	0.00100821	ASNS/MTHFD1	2
GO:0016236	macroautophagy	44306	291/18723	0.000227544	0.00174098	0.00100821	TBC1D5/VPS26A/VPS26B/VPS35	4
GO:0006541	glutamine metabolic process	44247	23/18723	0.000270602	0.00202336	0.00117175	ASNS/PHGDH	2
GO:0098876	vesicle-mediated transport to the plasma membrane	44275	136/18723	0.000390373	0.00285406	0.00165281	VPS26A/VPS29/VPS35	3
GO:0016241	regulation of macroautophagy	44275	141/18723	0.000433896	0.0031033	0.00179714	VPS26A/VPS26B/VPS35	3
GO:0021915	neural tube development	44275	152/18723	0.000540359	0.00378251	0.00219048	MTHFD1/MTHFD1L/PHGDH	3
GO:0070536	protein K63-linked deubiquitination	44247	35/18723	0.000631523	0.00432857	0.0025067	BABAM1/SHMT2	2
GO:0072521	purine-containing compound metabolic process	44306	416/18723	0.000877508	0.00589184	0.00341201	GART/MTHFD1/SHMT1/SHMT2	4
GO:0048701	embryonic cranial skeleton morphogenesis	44247	46/18723	0.00109082	0.00717762	0.00415661	MTHFD1/MTHFD1L	2
GO:0051289	protein homotetramerization	44247	57/18723	0.00167028	0.010775	0.00623986	SHMT1/SHMT2	2
GO:1904888	cranial skeletal system development	44247	68/18723	0.00236731	0.0149778	0.00867374	MTHFD1/MTHFD1L	2
GO:0051262	protein tetramerization	44247	87/18723	0.00384073	0.0234	0.0135511	SHMT1/SHMT2	2
GO:1901606	alpha-amino acid catabolic process	44247	87/18723	0.00384073	0.0234	0.0135511	SHMT1/SHMT2	2
GO:0001843	neural tube closure	44247	88/18723	0.00392754	0.0234939	0.0136055	MTHFD1/MTHFD1L	2
GO:0060606	tube closure	44247	89/18723	0.00401527	0.0235897	0.013661	MTHFD1/MTHFD1L	2
GO:0097581	lamellipodium organization	44247	90/18723	0.0041039	0.0236874	0.0137176	SNX1/SNX2	2
GO:0010506	regulation of autophagy	44275	317/18723	0.00442643	0.0244968	0.0141863	VPS26A/VPS26B/VPS35	3
GO:0014020	primary neural tube formation	44247	94/18723	0.00446751	0.0244968	0.0141863	MTHFD1/MTHFD1L	2
GO:0048704	embryonic skeletal system morphogenesis	44247	94/18723	0.00446751	0.0244968	0.0141863	MTHFD1/MTHFD1L	2
GO:0001841	neural tube formation	44247	102/18723	0.0052379	0.0282503	0.01636	MTHFD1/MTHFD1L	2
GO:0009063	cellular amino acid catabolic process	44247	110/18723	0.00606508	0.032184	0.018638	SHMT1/SHMT2	2
GO:0031623	receptor internalization	44247	113/18723	0.00638972	0.0333686	0.019324	SNX1/TBC1D5	2
GO:0001838	embryonic epithelial tube formation	44247	121/18723	0.00729348	0.0369162	0.0213785	MTHFD1/MTHFD1L	2
GO:0048706	embryonic skeletal system development	44247	121/18723	0.00729348	0.0369162	0.0213785	MTHFD1/MTHFD1L	2
GO:0072175	epithelial tube formation	44247	132/18723	0.00862514	0.042995	0.0248987	MTHFD1/MTHFD1L	2
GO:0016579	protein deubiquitination	44247	139/18723	0.00952525	0.0467732	0.0270867	BABAM1/SHMT2	2
GO:0016331	morphogenesis of embryonic epithelium	44247	147/18723	0.0106032	0.0484109	0.0280351	MTHFD1/MTHFD1L	2
GO:0006547	histidine metabolic process	44216	10/18723	0.0106334	0.0484109	0.0280351	MTHFD1	1
GO:0006560	proline metabolic process	44216	10/18723	0.0106334	0.0484109	0.0280351	ALDH18A1	1
GO:0030953	astral microtubule organization	44216	10/18723	0.0106334	0.0484109	0.0280351	KPNB1	1
GO:0099639	neurotransmitter receptor transport, endosome to plasma membrane	44216	10/18723	0.0106334	0.0484109	0.0280351	VPS35	1
GO:0035148	tube formation	44247	148/18723	0.0107416	0.0484109	0.0280351	MTHFD1/MTHFD1L	2
GO:0006188	IMP biosynthetic process	44216	11/18723	0.0116908	0.0494889	0.0286594	GART	1
GO:0060159	regulation of dopamine receptor signaling pathway	44216	11/18723	0.0116908	0.0494889	0.0286594	VPS35	1
GO:0070314	G1 to G0 transition	44216	11/18723	0.0116908	0.0494889	0.0286594	PHGDH	1
GO:0075733	intracellular transport of virus	44216	11/18723	0.0116908	0.0494889	0.0286594	KPNA2	1
GO:0006606	protein import into nucleus	44247	155/18723	0.0117329	0.0494889	0.0286594	KPNA2/KPNB1	2
	Table S4 KEGG Pathway of top 20 PSAT1 co-expression genes
	Description	GeneRatio	BgRatio	pvalue	p.adjust	qvalue	geneID	Count
hsa01230	Biosynthesis of amino acids	44396	75/8105	2.01328e-10	3.22125e-09	1.27154e-09	5832/440/26227/29968/5723/6470/6472	7
hsa00670	One carbon pool by folate	44335	20/8105	6.06048e-10	4.84838e-09	1.91384e-09	2618/4522/25902/6470/6472	5
hsa00260	Glycine, serine and threonine metabolism	44335	40/8105	2.49894e-08	1.33277e-07	5.26092e-08	26227/29968/5723/6470/6472	5
hsa01200	Carbon metabolism	44335	115/8105	5.22877e-06	2.09151e-05	8.25595e-06	26227/29968/5723/6470/6472	5
hsa04144	Endocytosis	44366	252/8105	1.6429e-05	5.25728e-05	2.07524e-05	6642/6643/9559/112936/51699/55737	6
hsa01240	Biosynthesis of cofactors	44335	155/8105	2.24541e-05	5.98776e-05	2.36359e-05	4522/25902/29968/6470/6472	5
hsa01523	Antifolate resistance	44274	31/8105	4.71067e-05	0.000107672	4.25023e-05	2618/6470/6472	3
hsa00630	Glyoxylate and dicarboxylate metabolism	44246	30/8105	0.00217802	0.00435604	0.00171949	6470/6472	2
hsa00270	Cysteine and methionine metabolism	44246	50/8105	0.00596473	0.010604	0.00418577	26227/29968	2
hsa03013	Nucleocytoplasmic transport	44246	108/8105	0.0259544	0.041527	0.0163922	3838/3837	2
